# Supplementary material for: Interferon-induced transmembrane protein 1 (IFITM1) is required for the progression of colorectal cancer
Source: PubMed Central journal article supplement (PMC5349895; doi:10.18632/oncotarget.13325), 2016-12-11
Supplement: oncotarget-07-86039-s001.pdf [file oncotarget-07-86039-s001.pdf]

## Interferon-induced transmembrane protein 1 (IFITM1) is required for the progression of colorectal cancer

### Supplementary Materials

**Supplementary Table 1: Primers used for realtime qPCR**

| No. | Target Gene | Sequence (5'-3')               |
|-----|-------------|--------------------------------|
| 1.  | IFITM1-F    | CATCCGGAAGAACTGGT              |
|     | IFITM1-R    | TCCCACAAAGCCAACTC              |
| 2.  | B2M-F       | TGAAGCTGACAGCATTCCGG           |
|     | B2M-R       | CTGCTGGATGACGTGAGTAAA          |
| 3.  | MMP2-F      | CGCTCAGATCCGTGGTGA             |
|     | MMP2-R      | CGCCAAATGAACCGGTCCTT           |
| 4.  | MMP9-F      | TTGACAGCGACAAGAAGTGG           |
|     | MMP9-R      | GCCATTCACGTGTCCTTAT            |
| 5.  | TIMP1-F     | AGACCTACACTGTTGGCTGTGAG        |
|     | TIMP1-R     | GACTTGAAGCCCTTTTCAGAG          |
| 6.  | TIMP2-F     | ATGCACATCACCTCTGTGA            |
|     | TIMP2-R     | CTCTGTGACCCAGTCCATCC           |
| 7.  | P27-F       | TGCAACCGACGATTCTTCTACTCAA      |
|     | P27-R       | CAAGCAGTGATGTATCTGATAAACAAAGGA |
| 8.  | CYCLIN D1-F | ACAAACAGATCATCCGCAAACAC        |
|     | CYCLIN D1-R | TGTTTGGGCTCCTCAGGTTT           |
| 9.  | CDK2-F      | GCTAGCAGACTTTGGACTAGCCAG       |
|     | CDK2-R      | AGCTCGGTACCACAGGGTCA           |
| 10. | E-Cad-F     | TTGCACCGGTGACAAAGGAC           |
|     | E-Cad-R     | TGGATTCCAGAAACGGAGGCC          |
| 11. | CDH2-F      | GGTGGAGGAGAAGAAGACCAG          |
|     | CDH2-R      | GGCATCAGGCTCCACAGT             |
| 12. | FN-F        | GAGAATGGACCTGCAAGCCCA          |
|     | FN-R        | AGTGCAAGTGATGCGTCCGC           |
| 13. | VIM-F       | ACCCGCACCAACGAGAAGGT           |
|     | VIM-R       | ATTCTGTGCTCCAGGAAGCG           |
| 14. | SNAI1-F     | CTGGGTGCCCTCAAGATGCA           |
|     | SNAI1-R     | CCGGACATGGCCTTGTAGCA           |
| 15. | SNAI2-F     | TACCGCTGCTCCATTCCACG           |
|     | SNAI2-R     | CATGGGGGTCTGAAAGCTTGG          |
| 16. | TWIST1-F    | TGCGGAAGATCATCCCCCG            |
|     | TWIST1-R    | GCTGCAGCTTGCCATCTTGGA          |
| 17. | KRT19-F     | GCCACTACTACACGACCATCC          |
|     | KRT19-R     | CAAACCTGGTTCCGGAAGTCAT         |
| 18. | ERBB3-F     | CTGATCACCGGCTCAAT              |
|     | ERBB3-R     | GGAAGACATTGAGCTTCTCTGG         |
| 19. | DDR1-F      | ATGGAGCAACCACAGCTTCTC          |
|     | DDR1-R      | CTCAGCCGGTCAAACCTCAAAC         |
| 20. | CAV1A-F     | ACAGCCCAGGGAAACCTC             |
|     | CAV1A-R     | GATGGGAACGGTGTAGAGATG          |
